# Supplementary material for: A multicenter, prospective, single arm, open label, observational study of sTMS for migraine prevention (ESPOUSE Study)
Source: PubMed Central journal article supplement — Cephalalgia. 2018 Mar 4;38(6):1038–48. doi: 10.1177/0333102418762525 (PMC5944078; doi:10.1177/0333102418762525), 2018-03-04
Supplement: Supplementary_Table_2.pdf [file Supplementary_Table_2.pdf]

Supporting Document Table 2: Baseline Qualitative Characteristics by Study Population

| <b>Characteristic</b> | <b>FAS<br/>x/N (%)</b> | <b>CC<br/>x/N (%)</b> | <b>PP<br/>x/N (%)</b> |
|-----------------------|------------------------|-----------------------|-----------------------|
| Sex (Female)          | 106/132 (80.30)        | 94/117 (80.34)        | 76/95 (80.00)         |
| Ethnicity             |                        |                       |                       |
| Caucasian             | 113/132 (85.61)        | 103/117 (88.03)       | 85/95 (89.47)         |
| African American      | 11/132 (8.33)          | 8/117 (6.84)          | 7/95 (7.37)           |
| Hispanic              | 7/132 (5.30)           | 5/117 (4.27)          | 3/95 (3.16)           |
| Other                 | 1/132 (0.76)           | 1/117 (0.85)          | 0/95 (0.00)           |
